# Supplementary material for: A Scalable Manufacturing Approach to Single Dose Vaccination against HPV
Source: MDPI journal article supplement (doi:10.3390/vaccines9010066), 2021-01-19
Supplement: s1 [file s1]

### Supporting information

| Name        | Sequence                 | Mass (expected/observed) | Purity(%) |
|-------------|--------------------------|--------------------------|-----------|
| GPSL N-expo | QLYKTCKQAGTCPPDGPSTC     | 2110.5/2110.2            | 96.5      |
| GPSL C-expo | CGPSLQLYKTCKQAGTCPPD     | 2110.5/2110.5            | 97.3      |
| GGSG N-expo | QLYKTCKQAGTCPPDGGSGGGSGC | 2272.5/2272.3            | 96.4      |
| GGSG C-expo | CGGSGGGSGQLYKTCKQAGTCPPD | 2272.5/2272.2            | 95.3      |

Table S1. Properties of the HPV peptides.

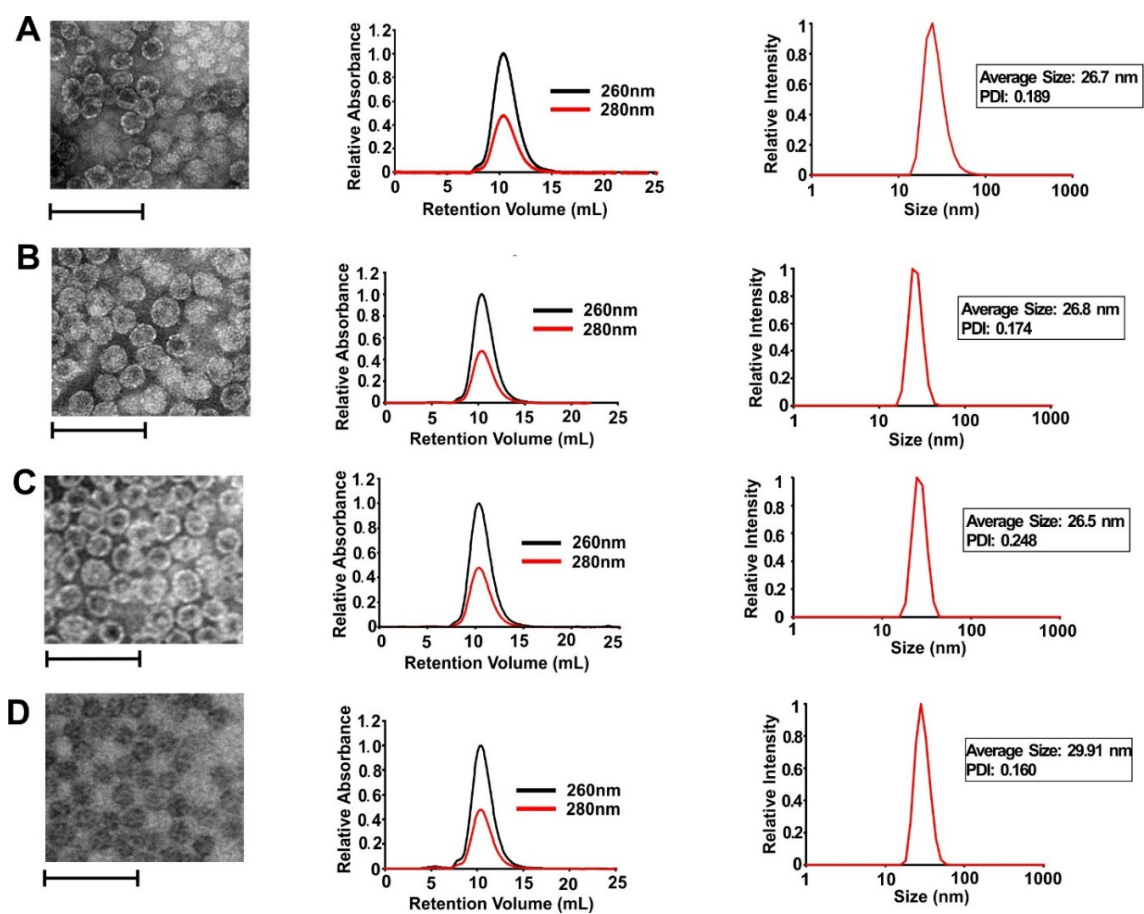

**Figure S1.** Characterization of Q $\beta$  and HPV-Q $\beta$  conjugates by TEM, FPLC and DLS. A) Q $\beta$ , B) GPSL-N-expo-HPV-Q $\beta$ , C) GPSL-C-expo-HPV-Q $\beta$ , and D) GGSG-N-expo-HPV-Q $\beta$ .

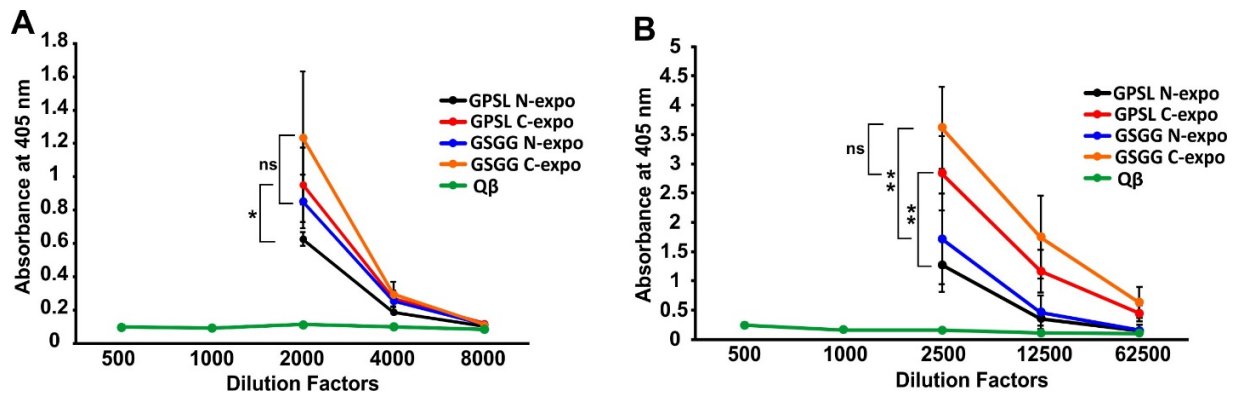

**Figure S2.** ELISA signals at 405 nm for mice vaccinated with various antigens at different dilutions after A) prime vaccination and B) the first boost (Data are means  $\pm$  s.d. for  $n = 5$  mice per group). Asterisks show significance as determined by unpaired two-tailed student's  $t$  test: ns, not significant  $p > 0.05$ ; \*  $p < 0.05$ ; \*\*  $p < 0.01$ ; \*\*\*  $p < 0.005$ .

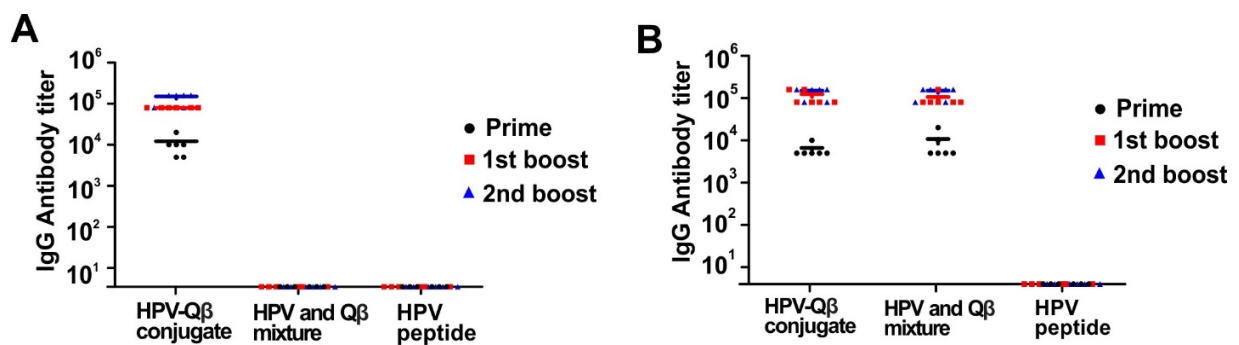

**Figure S3.** Vaccination with HPV-Q $\beta$  solutions. The serum IgG antibody titer against A) the HPV peptide and B) Q $\beta$  for mice vaccinated with 30  $\mu$ g HPV-Q $\beta$ , a mixture of 5  $\mu$ g HPV and 30  $\mu$ g Q $\beta$ , or 5  $\mu$ g HPV peptide alone. Mice were subcutaneously injected with the agents on days 0 (prime),

14 (first boost) and 21 (second boost). Blood was collected 7 days after each injection (n = 6 for each group).

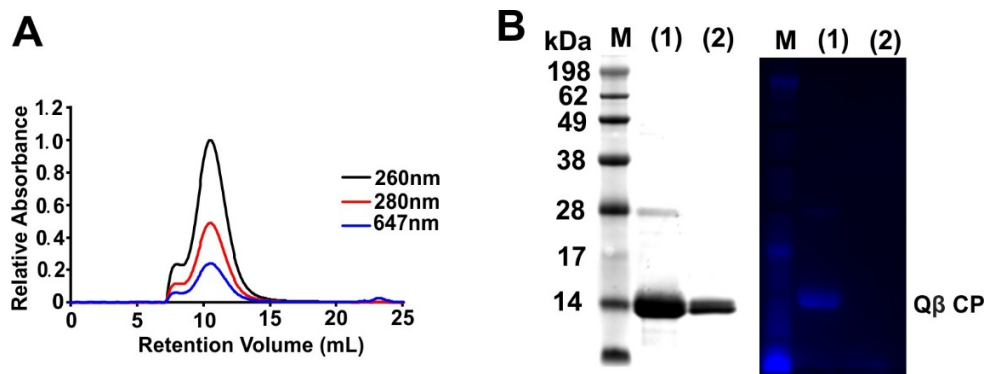

**Figure S4.** The characterization of Cy5-Q $\beta$ . A) FPLC chromatogram of Cy5-Q $\beta$ . B) SDS-PAGE analysis of Cy5-Q $\beta$  (lane 1) and unmodified Q $\beta$  (lane 2). The Coomassie Brilliant Blue channel is shown on the left, and the blue fluorescence channel on the right. M = size markers.

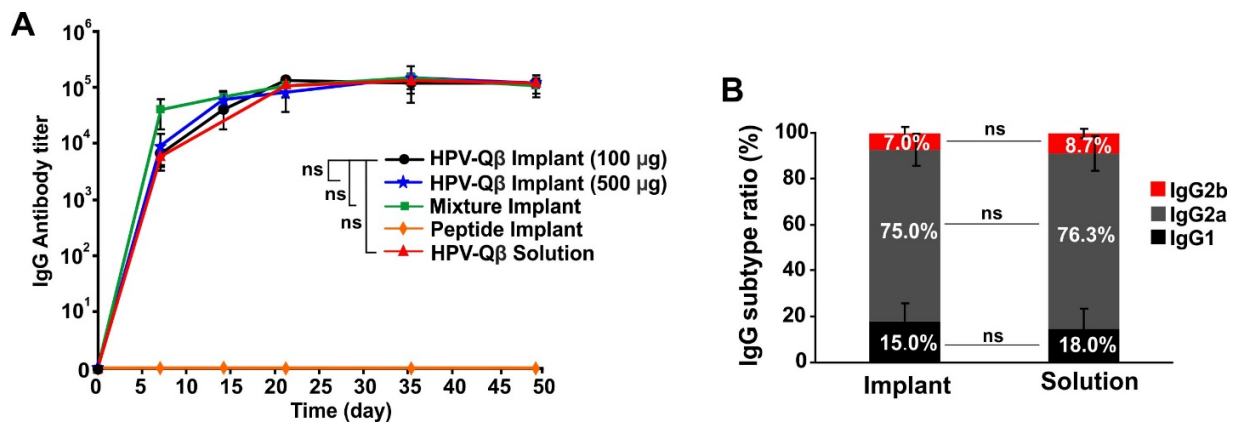

**Figure S5.** Immunization of mice with Q $\beta$  particles. A) The serum titer of Q $\beta$ -specific IgG in mice vaccinated with three subcutaneous injections of 30  $\mu$ g HPV-Q $\beta$  or a single dose of 100  $\mu$ g HPV-Q $\beta$ , 500  $\mu$ g HPV-Q $\beta$ , a mixture of 100  $\mu$ g Q $\beta$  and 20  $\mu$ g HPV peptide, or 20  $\mu$ g HPV peptide

alone, in each case loaded on a subcutaneous PLGA implant. B) Q $\beta$ -specific IgG subtype ratio in mice vaccinated with a single-dose PLGA implant containing 100  $\mu$ g HPV-Q $\beta$ , or three doses of 35  $\mu$ g HPV-Q $\beta$ . (Data are means  $\pm$  s.d. for n=6 mice per group). Statistical significance was determined by unpaired two-tailed student's t test: ns, not significant with p>0.05.

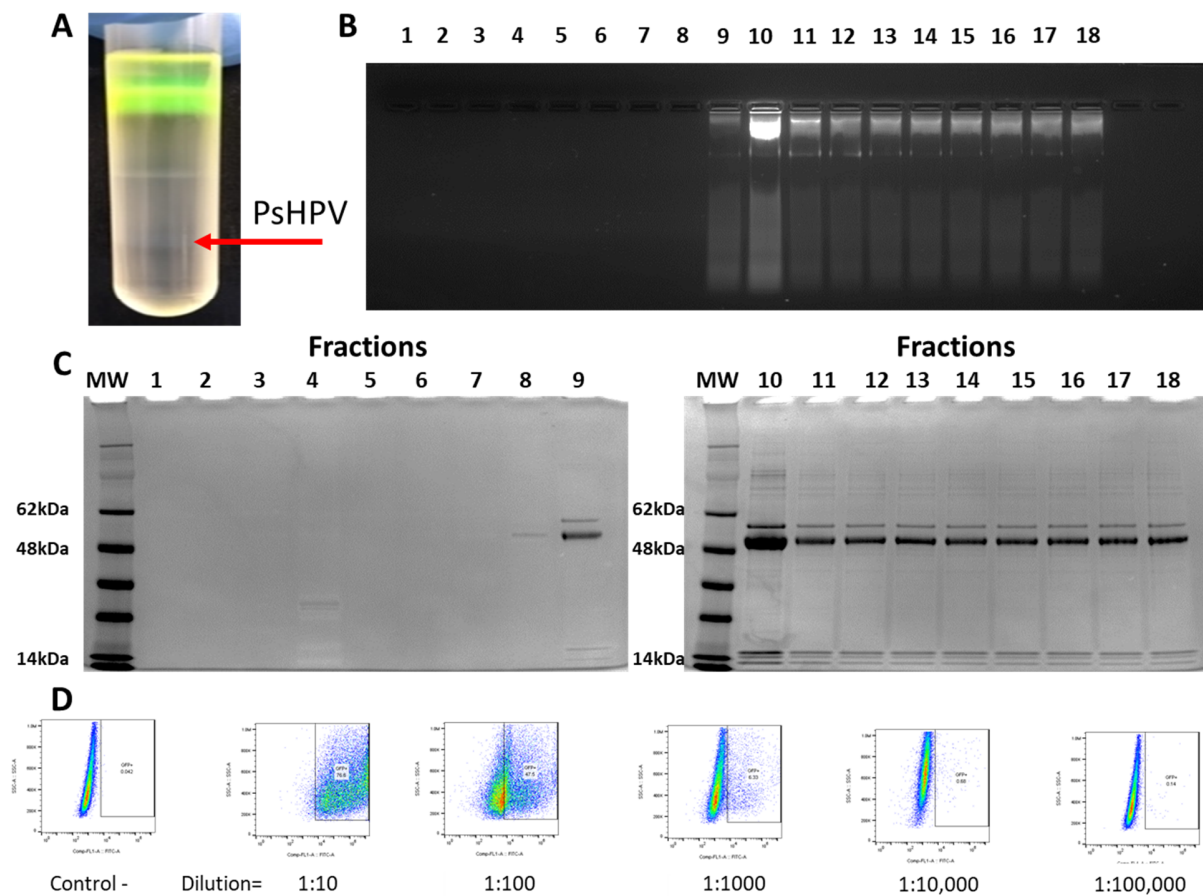

**Figure S6.** Production and characterization of HPV16 pseudovirus (PsHPV). A) Pseudovirus purification after ultracentrifugation. The red arrow indicates the band corresponding to the intact pseudovirus particles. B) Different fractions (1–18) of pseudovirus particles prepared by ultracentrifugation and separated by 2% agarose gel electrophoresis. The presence of bands

indicates pseudovirus DNA. C) SDS-PAGE analysis (14–20% gels) of the same fractions tested in B, showing resolved bands representing L1 (50–55 kDa) and histone (15 kDa). Fractions 9–18 were considered pseudovirus positive and were used for the neutralization assay. MW = molecular weight. D) Pooled fractions (9–18) titrated and analyzed by flow cytometry. The presence of GFP-positive cells indicates an infection.

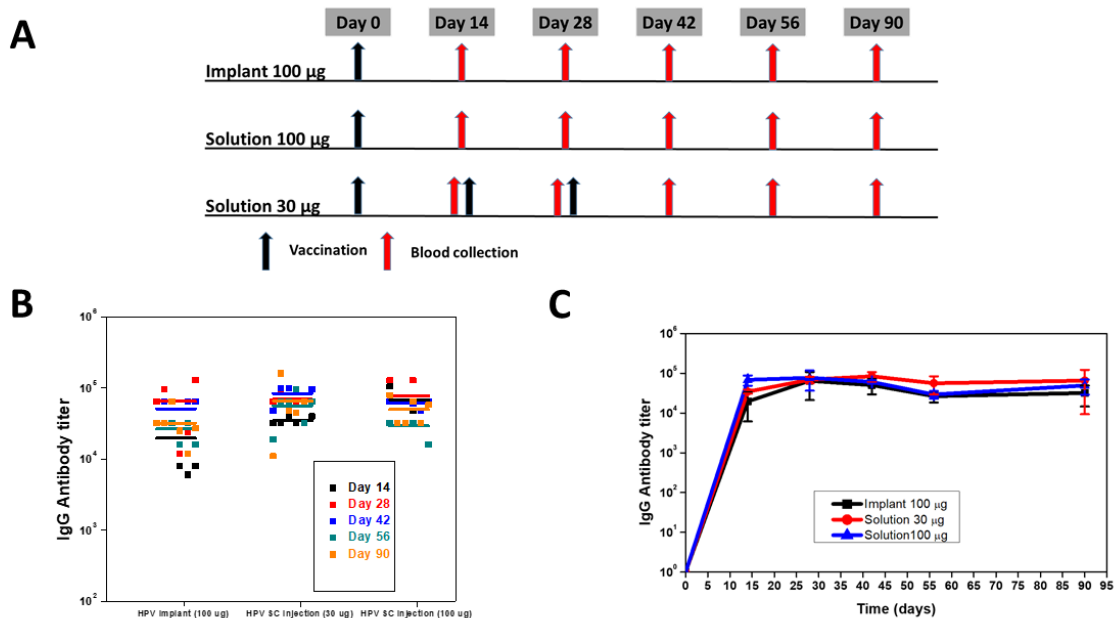

**Figure S7.** Immunization with HPV-Q $\beta$  at different doses and schedules. Mice were immunized with i) single dose PLGA implant loaded with 100  $\mu$ g HPV-Q $\beta$  ii) single subcutaneous injection of 100  $\mu$ g HPV-Q $\beta$  solution, and iii) three subcutaneous injections of 30  $\mu$ g HPV-Q $\beta$  solution. Six mice were studied per group. A) Schedule for vaccination (black arrow) and bleeding (red arrow) for all three vaccine formulations. Blood collection was done every two weeks. B) Serum titers of HPV-specific IgG for vaccinated mice on day 14 (black), day 28 (red), day 42 (blue), day 56 (cyan), day 90 (orange). Scattered points represent individual mouse and horizontal lines represent

the mean for each group. C) Kinetic profile of HPV-specific IgG antibody titer for mice groups vaccinated with different vaccine formulation: 100 µg of HPV-Qβ loaded implant (black), single subcutaneous injection of 100 µg HPV-Qβ solution (blue), three subcutaneous injections of 30 µg HPV-Qβ solution (red). Error bars represent uncertainties ( $\pm 1\sigma$ ) for each mice group.

### Appendix S1. Exponential Decay Kinetics, Produced from Slow Release Implant

Broadly, decay of antibody in a mouse follows the well-known exponential decay law. Let  $\lambda$  be the decay constant (lifetime =  $\frac{1}{\lambda}$ ) of the HPV antibodies in mice. For single dose subcutaneous injection,  $N_0$  number of HPV antibodies were produced in a mouse at once (say, time  $T=0$ ). Then after a time  $T$ , the number of antibodies present in the mouse is

$$N_1(T) = N_0 e^{-\lambda T} \dots\dots\dots(1)$$

Now consider a slow release process. Let an implant be inserted in the mouse and  $N_0$  number of antibodies were produced within the mouse in a total time-period of  $T_R$  in  $n$  number of discrete steps. Assuming a linear release as observed from **Figure 4** in the manuscript, following calculation is done.

$\frac{N_0}{n}$  number of antibodies were produced at the instant  $T=0$  and the number of antibodies present in the mouse at the instant  $T$  from the 1<sup>st</sup> production is  $= \frac{N_0}{n} e^{-\lambda T}$ .

Then, at the  $\frac{T_R}{n}$  instant (counting from the same  $T=0$  instant when the implant was inserted into the mouse), a 2<sup>nd</sup> installment of  $\frac{N_0}{n}$  number of antibodies were produced in the mouse. Therefore, at the instant  $T$ , the number of antibodies present in the mouse from the 2<sup>nd</sup> production would be=

$$\frac{N_0}{n} e^{-\lambda \left(T - \frac{T_R}{n}\right)}.$$

Similarly, the 3<sup>rd</sup> production of  $\frac{N_0}{n}$  number of antibodies would take place at the instant  $\frac{2T_R}{n}$  and the number of antibodies present in the mouse at the instant T from the 3<sup>rd</sup> production is =  $\frac{N_0}{n} e^{-\lambda\left(T-\frac{2T_R}{n}\right)}$ .

In this way, we can go on calculating up to the n<sup>th</sup> production. Hence, the number of antibodies present in the mouse at the instant T because of this slow release from the implant inserted in the mouse at the instant T=0 is

$$N_2(T) = \frac{N_0}{n} e^{-\lambda T} + \frac{N_0}{n} e^{-\lambda\left(T-\frac{T_R}{n}\right)} + \frac{N_0}{n} e^{-\lambda\left(T-\frac{2T_R}{n}\right)} + \dots + \frac{N_0}{n} e^{-\lambda\left[T-\frac{(n-1)T_R}{n}\right]}$$

$$\therefore N_2(T) = \frac{N_0}{n} e^{-\lambda T} \sum_{k=0}^{n-1} e^{k\lambda\frac{T_R}{n}} = \frac{N_0}{n} e^{-\lambda T} \left( \frac{1-e^{\lambda T_R}}{1-e^{\lambda T_R/n}} \right) \dots\dots\dots (2)$$

(By summing the geometric progression series)

Then, we get

$$\frac{N_1(T)}{N_2(T)} = \frac{n\left(1 - e^{\frac{\lambda T_R}{n}}\right)}{1 - e^{\lambda T_R}}$$

Now, let us consider a continuous slow release with the linearity assumption as before. So, in the above equation, we have to take the limit  $n \rightarrow \infty$ .

Let us assume  $x = \frac{1}{n}$  and we shall take the limit  $x \rightarrow 0$ . We rewrite the above equation as

$$\frac{N_1(T)}{N_2(T)} = \frac{(1 - e^{x\lambda T_R})}{x(1 - e^{\lambda T_R})}$$

So, for continuous slow release (using L'Hospital's theorem)

$$\frac{N_1(T)}{N_2(T)} = \lim_{x \rightarrow 0} \frac{(1 - e^{x\lambda T_R})}{x(1 - e^{\lambda T_R})} = \frac{\lim_{x \rightarrow 0} (-\lambda T_R e^{x\lambda T_R})}{\lim_{x \rightarrow 0} (1 - e^{\lambda T_R})} = \frac{-\lambda T_R}{1 - e^{\lambda T_R}} \dots\dots\dots (3)$$



So, at any instant  $T$ ,  $\frac{N_1(T)}{N_2(T)}$  is independent of  $T$  and depends only on  $\lambda$  and  $T_R$ . For HPV antibodies

$T_R \approx 25$  days and the lifetime of the antibody is very long ( $>90$  days) and hence  $\lambda = \frac{1}{90} \text{ days}^{-1}$ .

So,  $\lambda T_R \ll 1$ . Hence, from eq. (3), we get

$$\frac{N_1(T)}{N_2(T)} = \frac{-\lambda T_R}{1 - e^{\lambda T_R}} = \frac{-\lambda T_R}{1 - \left(1 + \lambda T_R + \frac{\lambda^2 T_R^2}{2} + \dots\right)} \approx \frac{-\lambda T_R}{-\lambda T_R} = 1$$

Hence, at any instant  $T$ , the ratio of antibodies in the mouse obtained from a single dose and slow release from an implant would be about the same.
